# Supplementary material for: Non-Apoptotic Caspase-3 Activation Mediates Early Synaptic Dysfunction of Indirect Pathway Neurons in the Parkinsonian Striatum
Source: MDPI journal article supplement (doi:10.3390/ijms23105470), 2022-05-13
Supplement: s1 [file s1]

## Supplementary Material

### Supplementary Figure S1

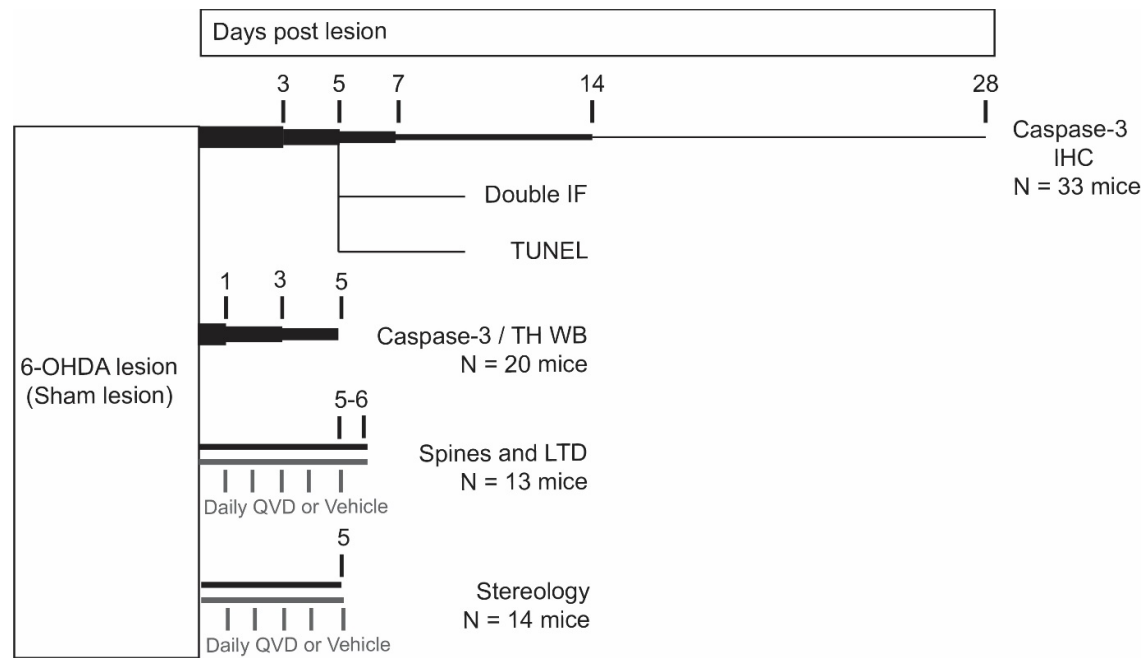

**Figure S1.** Experimental layout. From top to bottom, the different arms show the different experimental groups the mice were divided into after 6-OHDA or Sham surgery. The different time points within the experimental arms are indicated by the numbers. Daily treatments are marked for the lower two arms. The type of experiment and number of mice used is given at the right end of every arm. A total of 80 mice was used in this study.

**Supplementary Table S1.** Details of statistical tests.

Supplementary Table S1: Details of statistical tests.

| Figure | Test |                                                  | P value           | Comment |                                    |
|--------|------|--------------------------------------------------|-------------------|---------|------------------------------------|
| 1      | G    | One-way ANOVA                                    | F (5, 27) = 4.625 | 0.0035  | Caspase-3 increase over time (IHC) |
|        |      | Bonferroni's multiple comparison test (vs. Sham) |                   | 0.038   | Day 3                              |
|        |      |                                                  |                   | 0.0022  | Day 5                              |
|        |      |                                                  |                   | 0.5429  | Day 7                              |
|        |      |                                                  |                   | >0.9999 | Day 14                             |
|        |      |                                                  |                   | >0.9999 | Day 28                             |
| 2      | A    | One-way ANOVA                                    | F (2, 17) = 106.7 | <0.0001 | TH decline over time               |
|        |      | Bonferroni's multiple comparison test            |                   | <0.0001 | Day 1 vs. Day 3                    |
|        |      |                                                  |                   | <0.0001 | Day 1 vs. Day 5                    |
|        |      |                                                  |                   | 0.3108  | Day 3 vs. Day 5                    |
|        | B    | One-way ANOVA                                    | F (2, 17) = 4.321 | 0.0316  | Caspase-3 increase over time (IHC) |
|        |      | Bonferroni's multiple comparison test            |                   | >0.999  | Day 1 vs. Day 3                    |
|        |      |                                                  |                   | 0.0449  | Day 1 vs. Day 5                    |
|        |      |                                                  |                   | 0.0947  | Day 3 vs. Day 5                    |
| 3      | A    | One-way ANOVA                                    | F (2, 29) = 19.43 | <0.0001 | Dendritic spines                   |
|        |      | Bonferroni's multiple comparison test            |                   | <0.0001 | Sham vs. 6-OHDA                    |
|        |      |                                                  |                   | 0.5077  | Sham vs. 6-OHDA + QVD              |
|        |      |                                                  |                   | <0.0001 | 6-OHDA vs. 6-OHDA + QVD            |
|        | F    | One-way ANOVA                                    | F (2, 17) = 24.44 | <0.0001 | EPSC post HFS                      |
|        |      | Bonferroni's multiple comparison test            |                   | 0.0002  | Sham vs. 6-OHDA                    |
|        |      |                                                  |                   | 0.7627  | Sham vs. 6-OHDA + QVD              |
|        |      |                                                  |                   | <0.0001 | 6-OHDA vs. 6-OHDA + QVD            |
|        | G    | Paired t-test                                    | t=3.609, df=5     | 0.0154  | Sham                               |
|        |      | Paired t-test                                    | t=0.6847, df=7    | 0.5155  | 6-OHDA                             |
|        |      | Paired t-test                                    | t=3.507, df=5     | 0.0171  | 6-OHDA + QVD                       |
| 4      | C    | One-way ANOVA                                    | F (2, 11) = 2239  | <0.0001 | Striatal TH                        |
|        |      | Bonferroni's multiple comparison test            |                   | <0.0001 | Sham vs. 6-OHDA                    |
|        |      |                                                  |                   | <0.0001 | Sham vs. 6-OHDA + QVD              |
|        |      |                                                  |                   | >0.9999 | 6-OHDA vs. 6-OHDA + QVD            |
|        | D    | One-way ANOVA                                    | F (2, 11) = 6.018 | 0.0172  | Nigral DA neurons                  |
|        |      | Bonferroni's multiple comparison test            |                   | 0.0430  | Sham vs. 6-OHDA                    |
|        |      |                                                  |                   | 0.0336  | Sham vs. 6-OHDA + QVD              |
|        |      |                                                  |                   | >0.9999 | 6-OHDA vs. 6-OHDA + QVD            |
